# Supplementary material
Source: PubMed Central journal article supplement (PMC8323104)
Supplement: NIHMS1723818-supplement-Supplemental_Materials.pdf [file NIHMS1723818-supplement-Supplemental_Materials.pdf]

# HLA-ABC

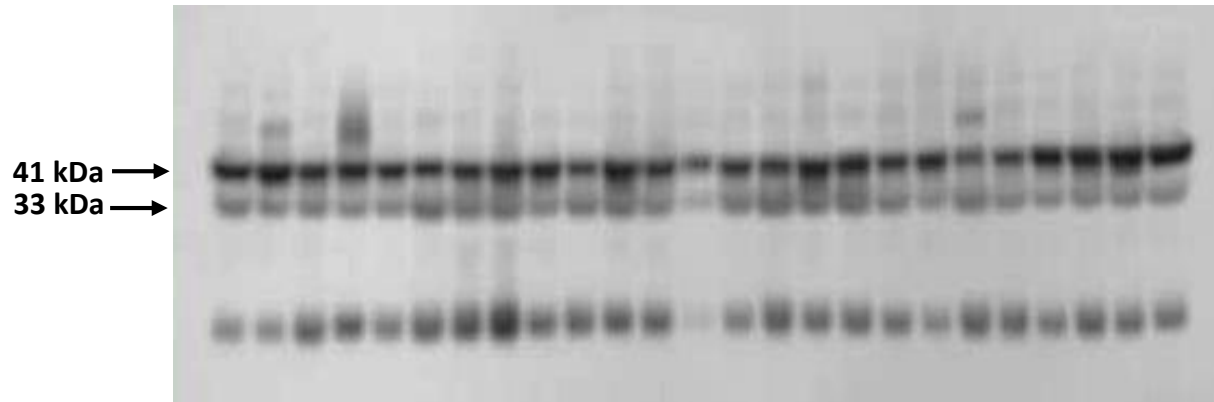

Patients with  
Adenocarcinoma  
(n=25)

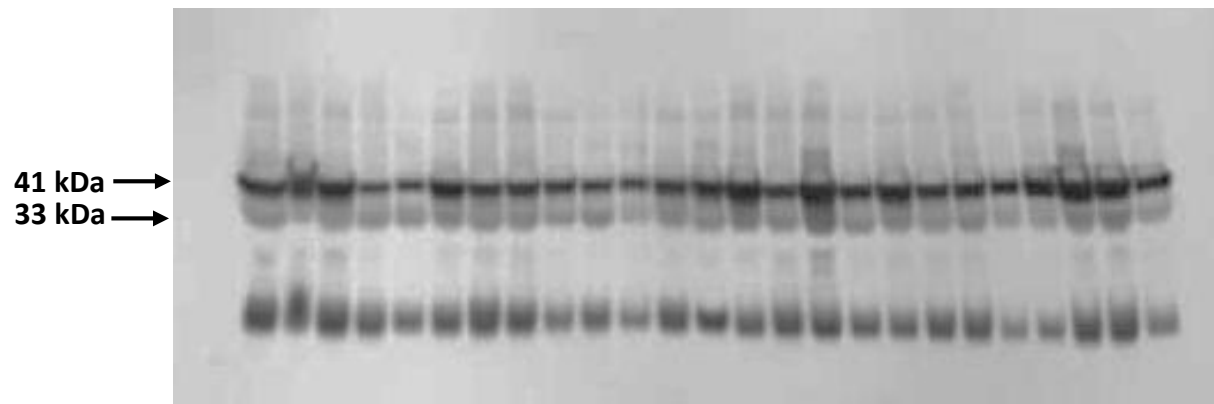

Patients with  
Benign Lesions  
(n=25)

# HLA-DQ

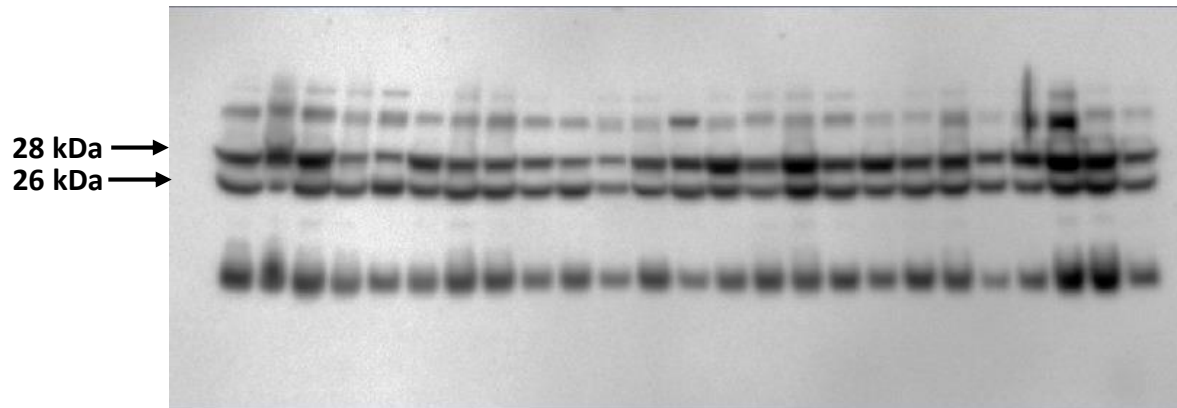

Patients with  
Adenocarcinoma  
(n=25)

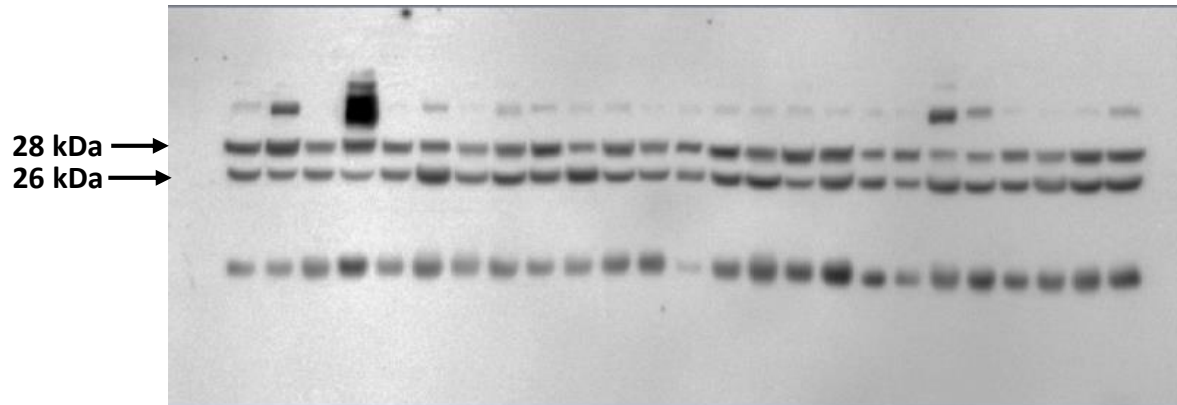

Patients with  
Benign Lesions  
(n=25)

# HLA-DMB

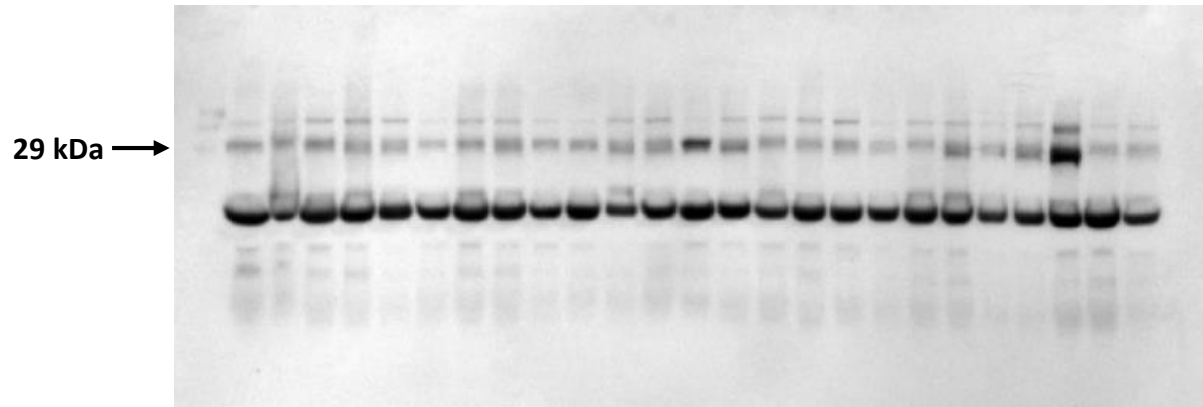

Patients with  
Adenocarcinoma  
(n=25)

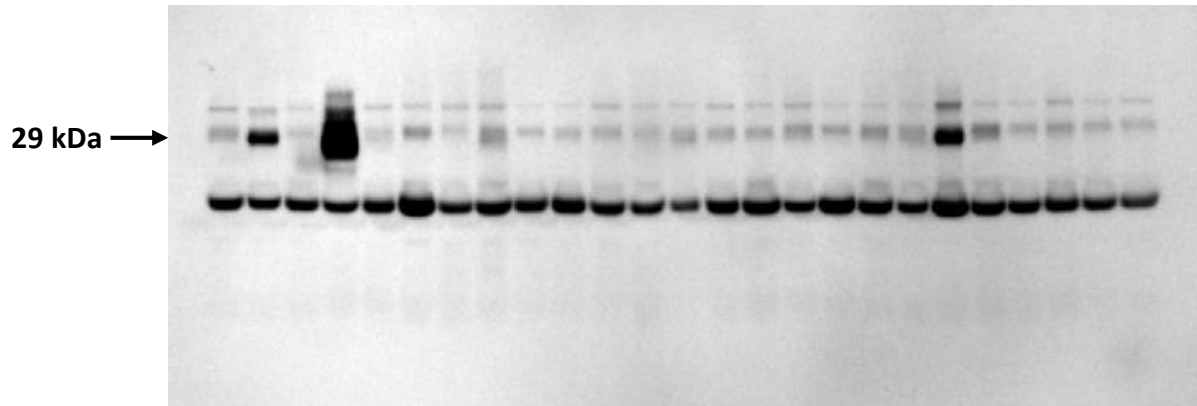

Patients with  
Benign Lesions  
(n=25)

# HLA-DQA1

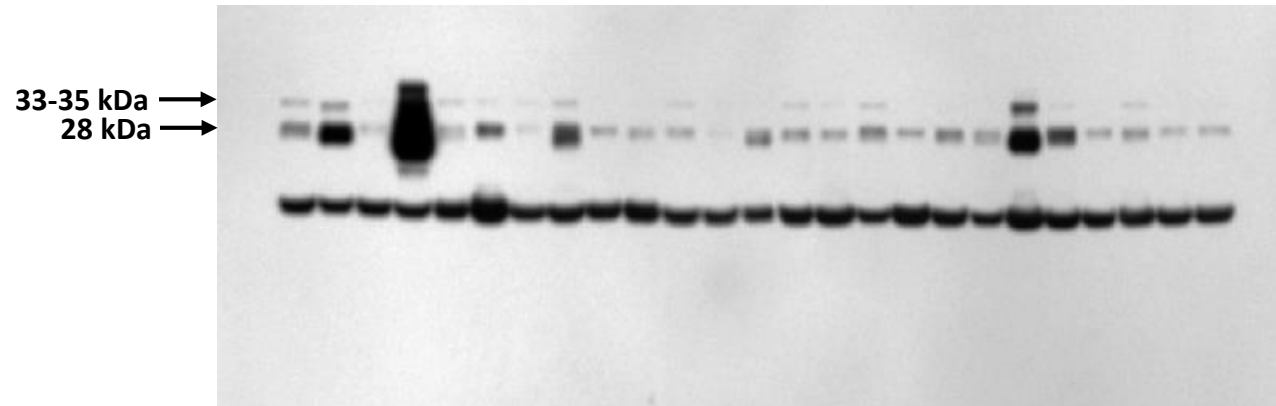

Patients with  
Adenocarcinoma  
(n=25)

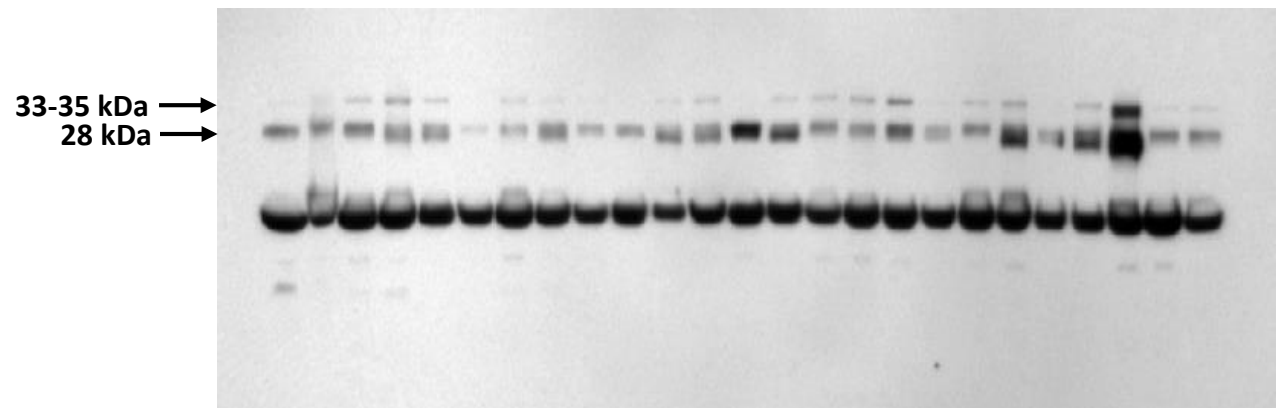

Patients with  
Benign Lesions  
(n=25)

# HLA-DRB1

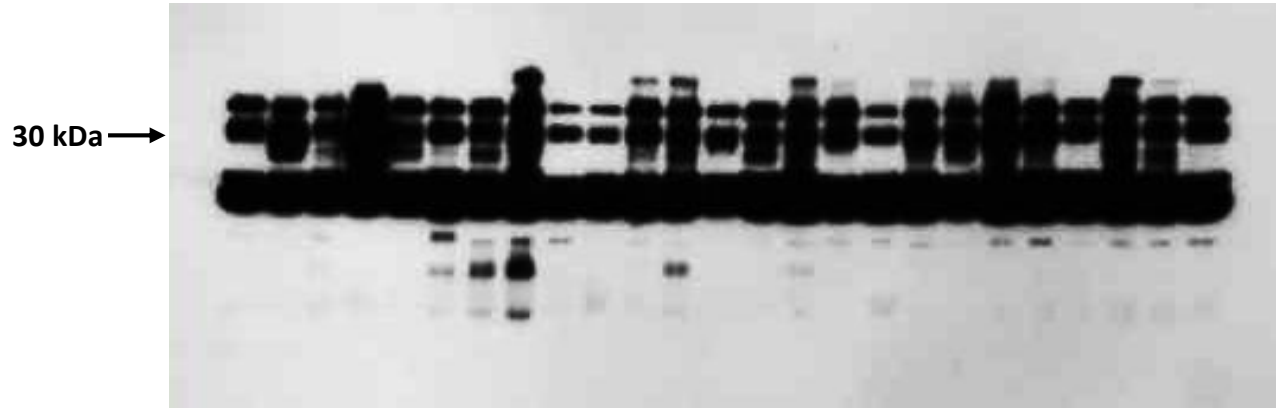

Patients with  
Adenocarcinoma  
(n=25)

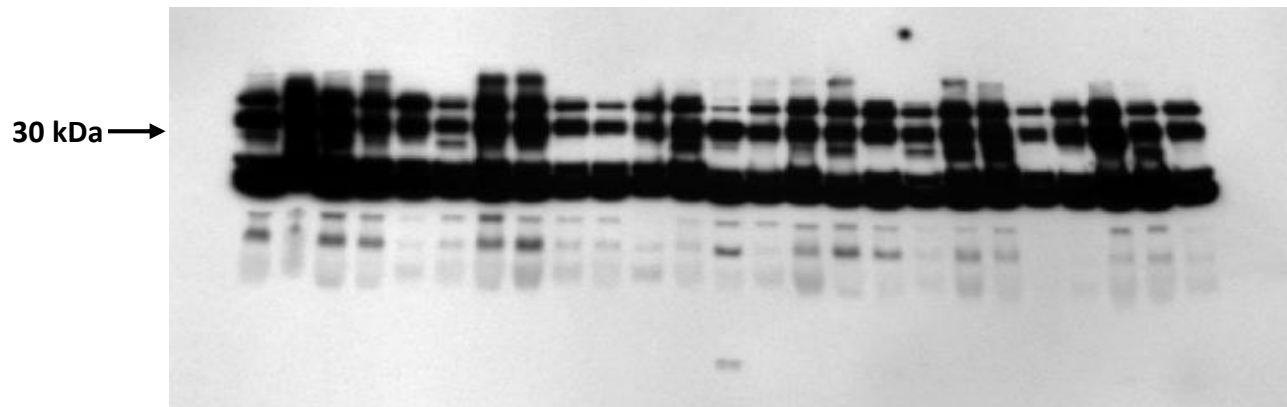

Patients with  
Benign Lesions  
(n=25)
